# Supplementary material for: The Combination of Epigallocatechin Gallate and Lactiplantibacillus plantarum P101 Alleviated Carbon Tetrachloride-Induced Liver Injury in Mice by Regulating Gut Microbiota
Source: MDPI journal article supplement (doi:10.3390/app122211636), 2022-11-16
Supplement: s1 [file s1]

# **The Combination of Epigallocatechin Gallate and *Lactiplantibacillus plantarum* P101 alleviated Carbon Tetrachloride-Induced Liver Injury in Mice by Regulating Gut Microbiota**

**Mengqi Wang <sup>1</sup>, Keyu Wang <sup>1</sup>, Yuankun Zhou <sup>1</sup>, Zoraida P. Aguilar <sup>2</sup>, Yuanxing Wang <sup>1,\*</sup> and Hengyi Xu <sup>1,\*</sup>**

1 State Key Laboratory of Food Science and Technology, Nanchang University, Nanchang 330047, China;

2 Zystein, LLC. Fayetteville, AR72704, USA.

\* Correspondence to:

**Hengyi Xu**

State Key Laboratory of Food Science and Technology, Nanchang University.

Address: 235 Nanjing East Road, Nanchang 330047, China.

Phone: +0086-791-8830-4447-ext-9520.

Fax: +0086-791-8830-4400.

E-mail: kidyxu@163.com

HengyiXu@ncu.edu.cn

**Yuanxing Wang**

E-mail: yuanxingwang@ncu.edu.cn

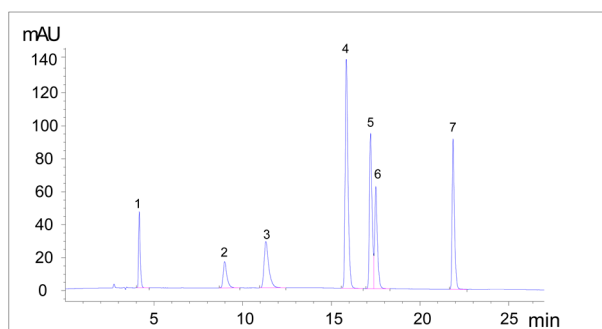

Figure S1. The chromatogram of catechins standard.

Table S1. The retention time and peak area of catechins standard.

| Peak | Retention time (min) | Peak area (mAU*s) |
|------|----------------------|-------------------|
| 1    | 4.170                | 294.29129         |
| 2    | 8.986                | 227.97755         |
| 3    | 11.311               | 510.29016         |
| 4    | 15.844               | 1532.63416        |
| 5    | 17.209               | 964.60785         |
| 6    | 17.507               | 649.75330         |
| 7    | 21.861               | 820.93536         |

Table S2. The retention time and peak area of catechins sample.

| Peak | Retention time (min) | Peak area (mAU*s) |
|------|----------------------|-------------------|
| 1    | 2.935                | 481.80072         |
| 2    | 3.716                | 929.43695         |
| 3    | 6.137                | 397.52637         |
| 4    | 10.430               | 807.30261         |
| 5    | 15.847               | 3367.54736        |
| 6    | 17.176               | 3397.59619        |
| 7    | 18.702               | 526.64307         |
| 8    | 21.834               | 1157.81091        |

Table S3. Primers used in this study

| Gene           | Forward                   | Reverse                     | Accession number |
|----------------|---------------------------|-----------------------------|------------------|
| <i>β-actin</i> | GCTCCTCCTGAGCGCAAGTA      | CAGCTCAGTAACAGTCCGCC        | NM_007393        |
| <i>TLR-4</i>   | CTGTATTCCCTCAGCACTCTTGATT | TGCTTCTGTTCCTTGACCCACT      | NM_021297        |
| <i>NF-κB</i>   | ACACTGGAAGCACGGATGAC      | TGTCTGTGAGTTGCCGGTCT        | NM_008689        |
| <i>TNF-α</i>   | CTGAACTTCGGGGTGATCGG      | GGCTTGTCACCTCGAATTTTGAGA    | NM_013693        |
| <i>IL-10</i>   | TAACTGCACCCACTTCCCAG      | AAGGCTTGGCAACCCAAGTA        | NM_010548        |
| <i>Nrf2</i>    | TTCCATTTACGGAGACCCACC     | GGATTCACGCATAGGAGCACTG      | NM_010902        |
| <i>Keap1</i>   | GAAGAGGCGGCAGAAGAAG       | GCTCCAGGGCTATGACAGAT        | NM_001110<br>307 |
| <i>NQO1</i>    | AGGATGGGAGGTACTCGAATC     | TGCTAGAGATGACTCGGAAGG       | NM_008706        |
| <i>SOD1</i>    | TAACTGAAGGCCAGCATGGGT     | GGTCTCCAACATGCCTCTCTTC      | NM_011434        |
| <i>SOD2</i>    | CAGACCTGCCTTACGACTATGG    | GCTGAAGAGCGACCTGAGTTGT      | NM_013671        |
| <i>CAT</i>     | TTGTTCAGTGACCGAGGGATT     | TTCCTGAGCAAGCCTTCCTG        | NM_009804        |
| <i>GCLC</i>    | ATGTGGACACCCGATGCAGTATT   | TGTCTTGCTTGTAAGTCAGGATGGTTT | NM_010295        |

Table S4. The activities of liver antioxidant enzymes.

|         | CAT<br>(U/mg prot)         | SOD<br>(U/mg prot)          |
|---------|----------------------------|-----------------------------|
| Control | 66.07 ± 1.06 <sup>ab</sup> | 288.67 ± 17.93 <sup>a</sup> |
| Model   | 84.16 ± 4.95 <sup>c</sup>  | 378.72 ± 24.19 <sup>b</sup> |
| P101    | 100.88 ± 5.97 <sup>d</sup> | 362.93 ± 35.56 <sup>b</sup> |
| EGCG    | 72.74 ± 3.02 <sup>b</sup>  | 353.02 ± 18.69 <sup>b</sup> |
| P+E     | 56.52 ± 6.05 <sup>a</sup>  | 289.55 ± 3.65 <sup>a</sup>  |

Data was expressed as mean ± SD. Different letters represented significant differences,  $p < 0.05$ .

Table S5. The  $\alpha$  diversity index of gut microbiota.

|         | <i>Shannon</i> | <i>Simpson</i> | <i>Ace</i>     | <i>Chao</i>    |
|---------|----------------|----------------|----------------|----------------|
| Control | 6.35 ± 0.36    | 0.96 ± 0.01    | 481.76 ± 12.42 | 482.68 ± 13.26 |
| Model   | 6.44 ± 0.22    | 0.96 ± 0.01    | 483.52 ± 3.74  | 491.32 ± 8.63  |
| P+E     | 6.5 ± 0.15     | 0.96 ± 0.01    | 494.83 ± 7.31  | 497.85 ± 7.24  |

Data was expressed as mean ± SD.
